# Supplementary material
Source: HighWire-hosted journal article supplement (http://thorax.bmjjournals.com/highwire/filestream/173979/field_highwire_adjunct_files/2/3_COPD_MiRNA_Supplemental_Figures_71911.3.pdf)
Supplement: 3_COPD_MiRNA_Supplemental_Figures_71911.3.pdf [file 3_COPD_MiRNA_Supplemental_Figures_71911.3.pdf]

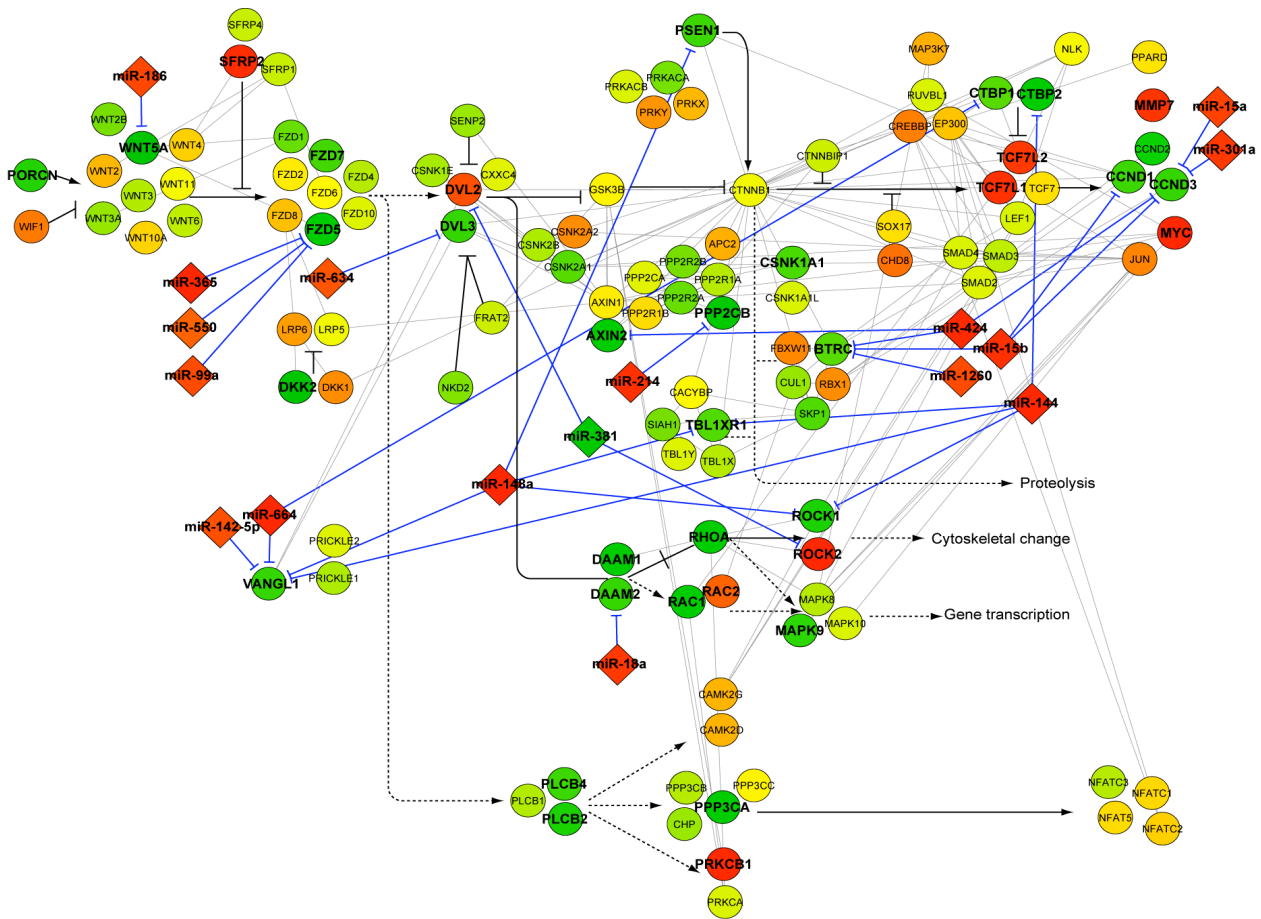

Supplemental Figure E2



| <b>GOLD</b>               | <b>Average FEV1/FVC</b> | <b>Standard Deviation</b> |
|---------------------------|-------------------------|---------------------------|
| <b>4</b>                  | <b>0.34</b>             | <b>0.12</b>               |
| <b>2</b>                  | <b>0.58</b>             | <b>0.074</b>              |
| <b>1</b>                  | <b>0.64</b>             | <b>0.045</b>              |
| <b>Normal<br/>Smokers</b> | <b>0.77</b>             | <b>0.05</b>               |

**Supplemental Table E5**

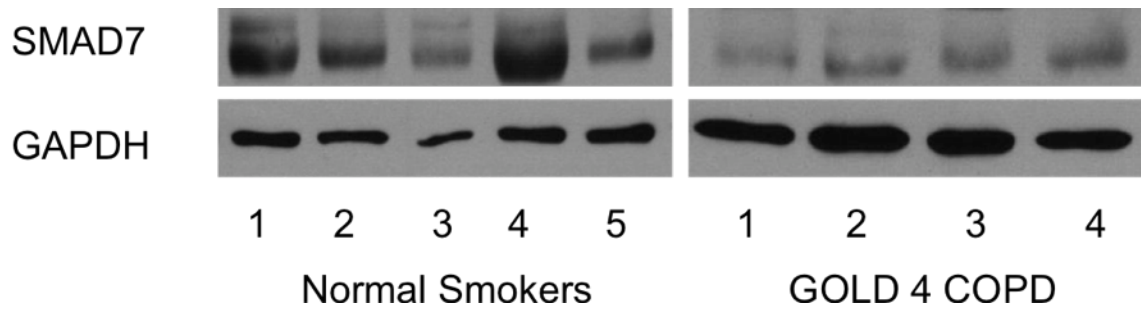

**Supplemental Figure E4**

| <b>GOLD STAGE</b>     | <b>GOLD STAGE</b> | <b>Difference</b> | <b>Adjusted p-value</b> |
|-----------------------|-------------------|-------------------|-------------------------|
| <b>Normal Smokers</b> | <b>1</b>          | -6.4921           | 0.4094                  |
| <b>Normal Smokers</b> | <b>2</b>          | -5.8889           | 0.4363                  |
| <b>Normal Smokers</b> | <b>4</b>          | 12.3222           | 0.0133                  |
| <b>1</b>              | <b>2</b>          | 0.6032            | 0.9989                  |
| <b>1</b>              | <b>4</b>          | 18.8143           | 0.0003                  |
| <b>2</b>              | <b>4</b>          | 18.2111           | 0.0002                  |

**Supplemental Table E6**

| <b>GOLD STAGE</b>     | <b>GOLD STAGE</b> | <b>Difference</b> | <b>Adjusted p-value</b> |
|-----------------------|-------------------|-------------------|-------------------------|
| <b>Normal Smokers</b> | <b>1</b>          | -16.1905          | 0.6092                  |
| <b>Normal Smokers</b> | <b>2</b>          | -18.3333          | 0.4781                  |
| <b>Normal Smokers</b> | <b>4</b>          | -30.7333          | 0.0686                  |
| <b>1</b>              | <b>2</b>          | -2.1429           | 0.9985                  |
| <b>1</b>              | <b>4</b>          | -14.5429          | 0.6708                  |
| <b>2</b>              | <b>4</b>          | -12.4000          | 0.7471                  |

**Supplemental Table E7**

| <b>GOLD STAGE</b>     | <b>GOLD STAGE</b> | <b>Difference</b> | <b>Adjusted p-value</b> |
|-----------------------|-------------------|-------------------|-------------------------|
| <b>Normal Smokers</b> | <b>1</b>          | 15.2222           | 0.0193                  |
| <b>Normal Smokers</b> | <b>2</b>          | 33.6667           | <.0001                  |
| <b>Normal Smokers</b> | <b>4</b>          | 83.0222           | <.0001                  |
| <b>1</b>              | <b>2</b>          | 18.4444           | 0.0035                  |
| <b>1</b>              | <b>4</b>          | 67.8000           | <.0001                  |
| <b>2</b>              | <b>4</b>          | 49.3556           | <.0001                  |

**Supplemental Table E8**
